# Supplementary material for: Cholesterol metabolism drives regulatory B cell IL-10 through provision of geranylgeranyl pyrophosphate
Source: PubMed Central journal article supplement (PMC7343868; doi:10.1038/s41467-020-17179-4), 2020-07-08

## **Supplementary Information**

**Cholesterol metabolism drives regulatory B cell IL-10 through provision of geranylgeranyl pyrophosphate**

**Bibby, J.A. et al.**

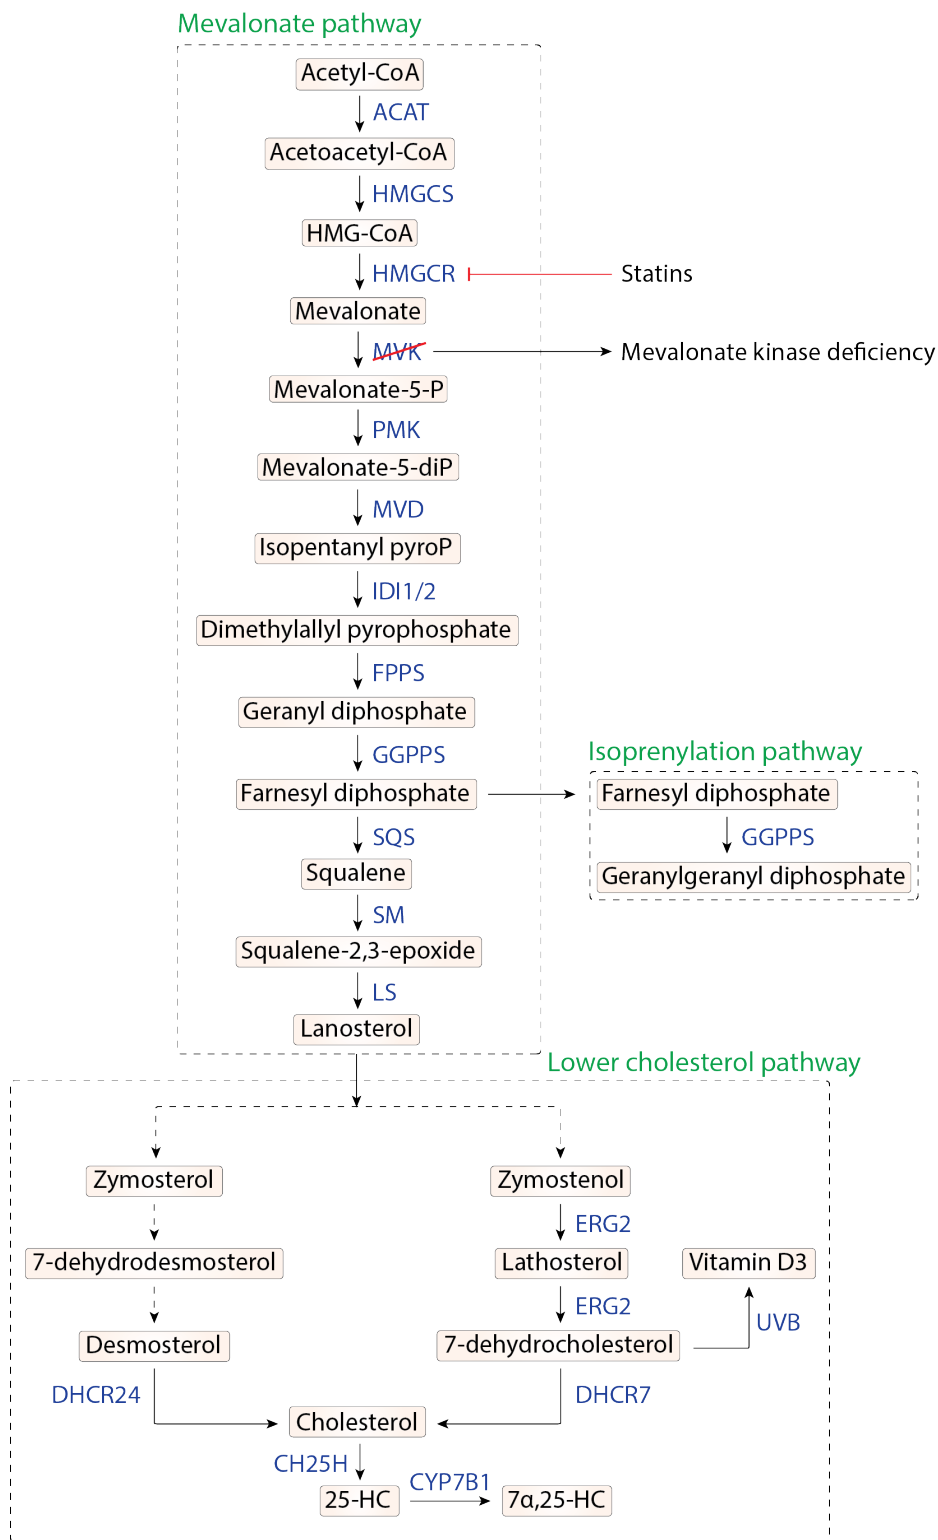

**Supplementary Figure 1. Outline of cholesterol metabolism showing key metabolites and enzymes of the pathway.**

An outline of key metabolites and enzymes in the multi-step conversion of acetyl-CoA to cholesterol and its derivatives, generally termed cholesterol metabolism. Mevalonate kinase deficient patients suffer a mutation in mevalonate kinase (MVK) enzyme, and progress to a severe autoinflammatory syndrome.

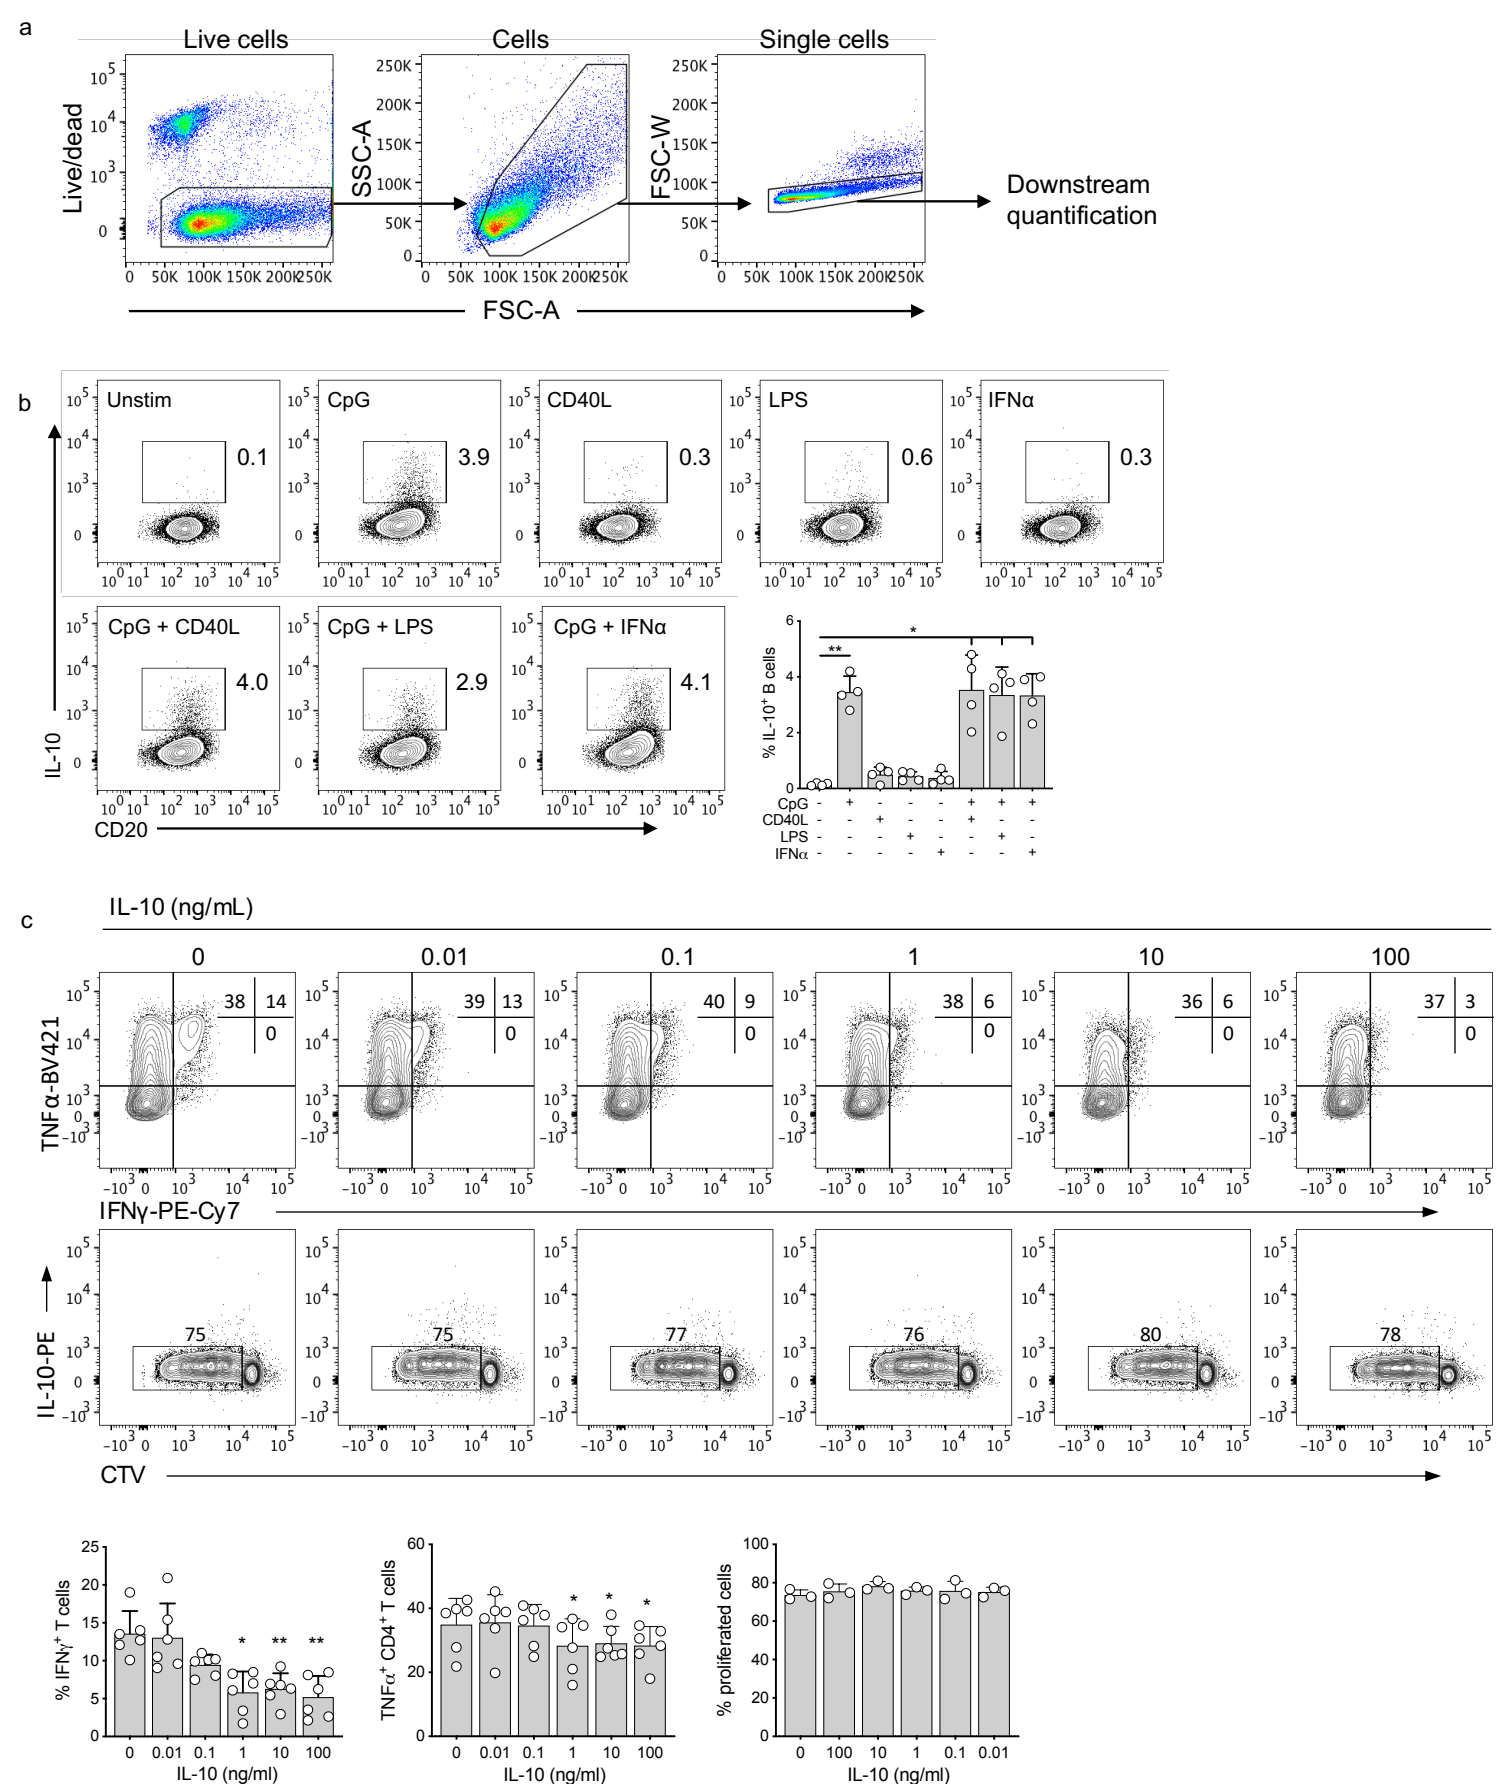

**Supplementary Figure 2. IL-10 production by B cells, and the effect of IL-10 on T cell effector function.** **a.** Gating strategy for analysis of human B cells. **b.** IL-10 production by human B cells after stimulation with the indicated ligand for 40 hours. **c.** Representative plots and quantification of IFN $\gamma$ , TNF $\alpha$  expression, and proliferation in CD4<sup>+</sup> T cells after stimulation with anti-CD3/anti-CD28, titration of recombinant human IL-10, and culture for 4 days (n=6 for cytokine measurement, pvals = 0.01, 0.001, 0.001, 0.02, 0.04, 0.02; n=3 for proliferation). Each data point represents individual donors. All data presented are mean  $\pm$  SD. Statistical testing in all figures was done by a Friedman's test with Dunns's multiple comparisons test. \*P<0.05, \*\*P<0.01 and all significant values are shown.

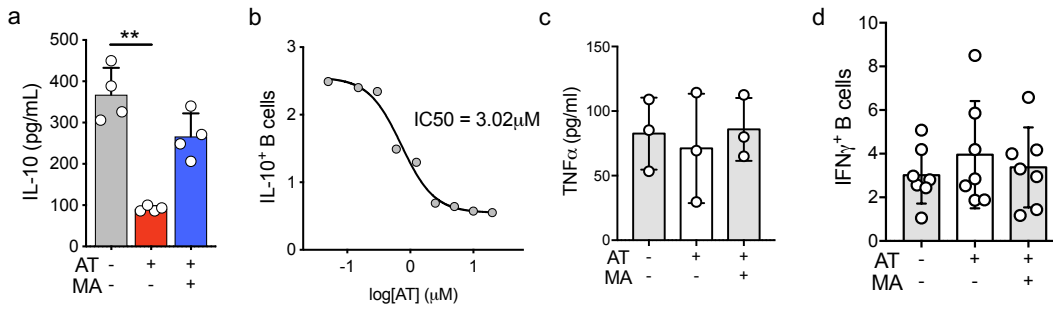

**Supplementary Figure 3. Cholesterol metabolism specifically regulates IL-10 expression.** **a.** IL-10 secretion from human B cells after TLR9 stimulation at 40 hours,  $\pm$  atorvastatin (AT)  $\pm$  mevalonate (MA) (n=4, pval = 0.005). **b.** IC50 of IL-10 expression in human B cells stimulated through TLR9 in the presence of titrated levels of AT (n=4). **c-d.** Expression of TNF $\alpha$  (ELISA) and IFN $\gamma$  (flow cytometry) in human B cells stimulated with TLR9  $\pm$  AT  $\pm$  MA (n=3 for TNF $\alpha$  and 7 for IFN $\gamma$ ). Each data point represents individual donors. All data presented are mean  $\pm$  SD. Statistical testing in all figures was done by a Friedman's test with Dunns's multiple comparisons test. \*\* $P$ <0.01 and all significant values are shown.

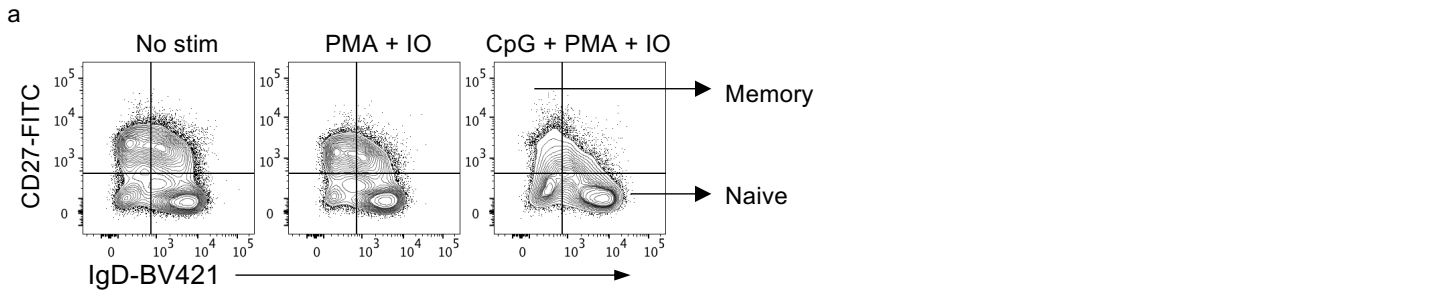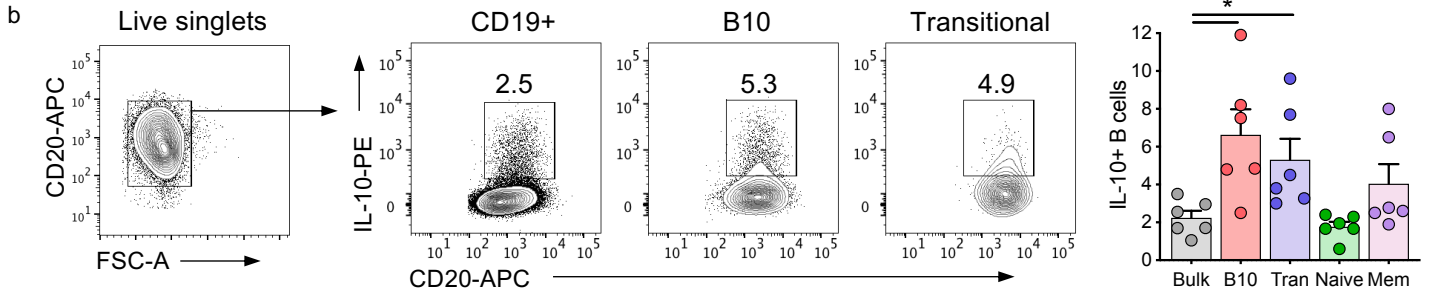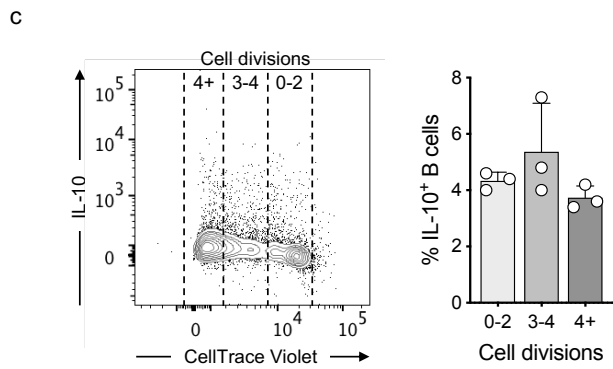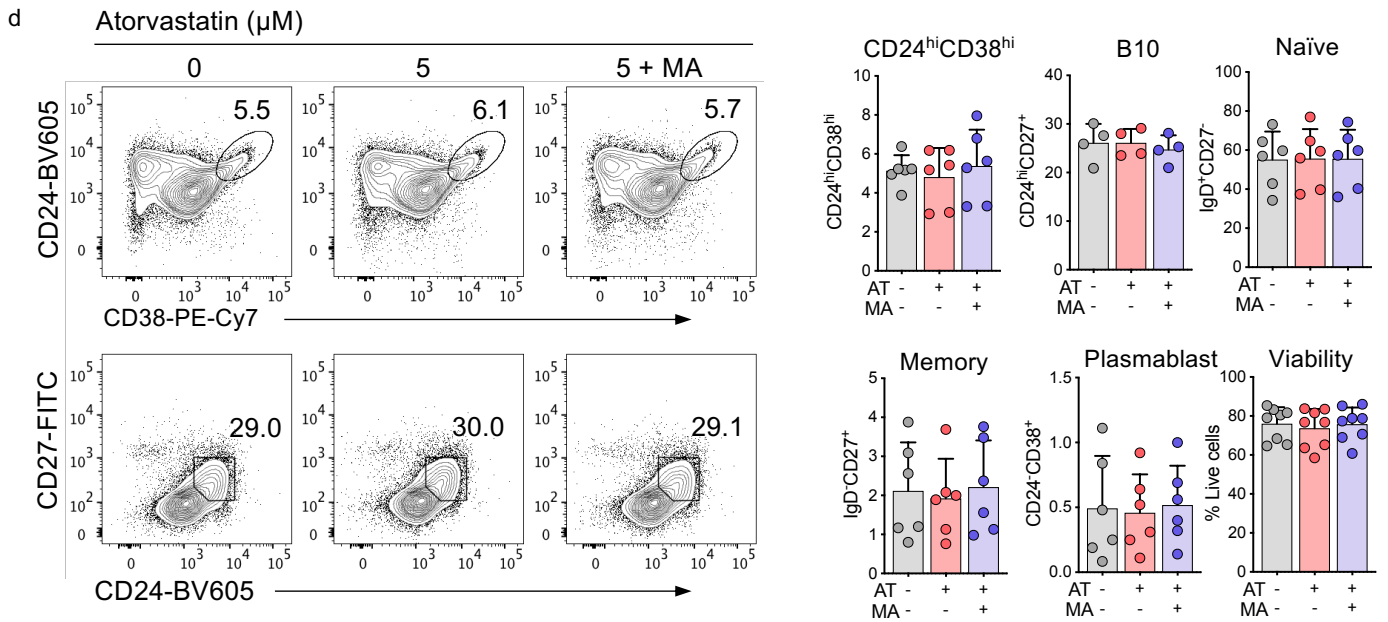

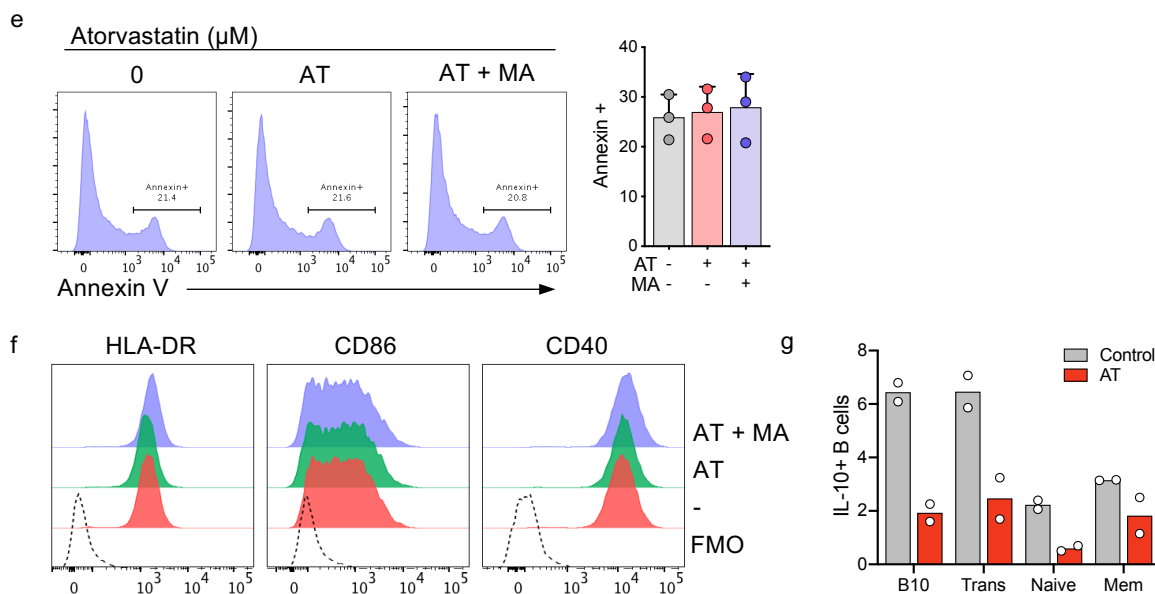

**Supplementary Figure 4. IL-10 expression within B cell populations, and the contribution of cholesterol**

**metabolism to B cell phenotype.** **a.** Gating of naïve versus memory B cells after CpG stimulation. CpG stimulation results in the downregulation of CD27, in comparison to unstimulated cells, or phorbol 12-myristate 13-acetate and ionomycin stimulated cells. Memory cells were defined from the upper left quadrant, whereas naïve cells were defined in the lower right. **b.** Percentage of IL-10<sup>+</sup> human B cells within each population (bulk (CD19<sup>+</sup>), B10, CD24<sup>hi</sup>CD38<sup>hi</sup>, naïve, and memory) (n=6, pvals = 0.02, 0.05). **c.** IL-10 expression analysed with respect to proliferation, as measured by CellTrace Violet staining prior to stimulation (n=3). **d-e.** Proportional analysis of B cell populations upon stimulation with TLR9  $\pm$  atorvastatin (AT)  $\pm$  mevalonate (MA), and viability measured by live/dead stain (**d**, n=6) or annexin positivity (**e**, n=3). **f.** Representative expression of HLA-DR, CD86, and CD40 on B cells after TLR9 stimulation  $\pm$  AT  $\pm$  MA. **g.** IL-10 expression within human B cell populations after stimulation through TLR9  $\pm$  AT. **g.** IL-10 expression in B cell populations following CpG stimulation in the presence or absence of AT. Each data point represents individual donors. All data presented are mean  $\pm$  SD. Statistical testing in all figures was done by a Friedman's test with Dunns's multiple comparisons test. \**P*<0.05 and all significant values are shown.

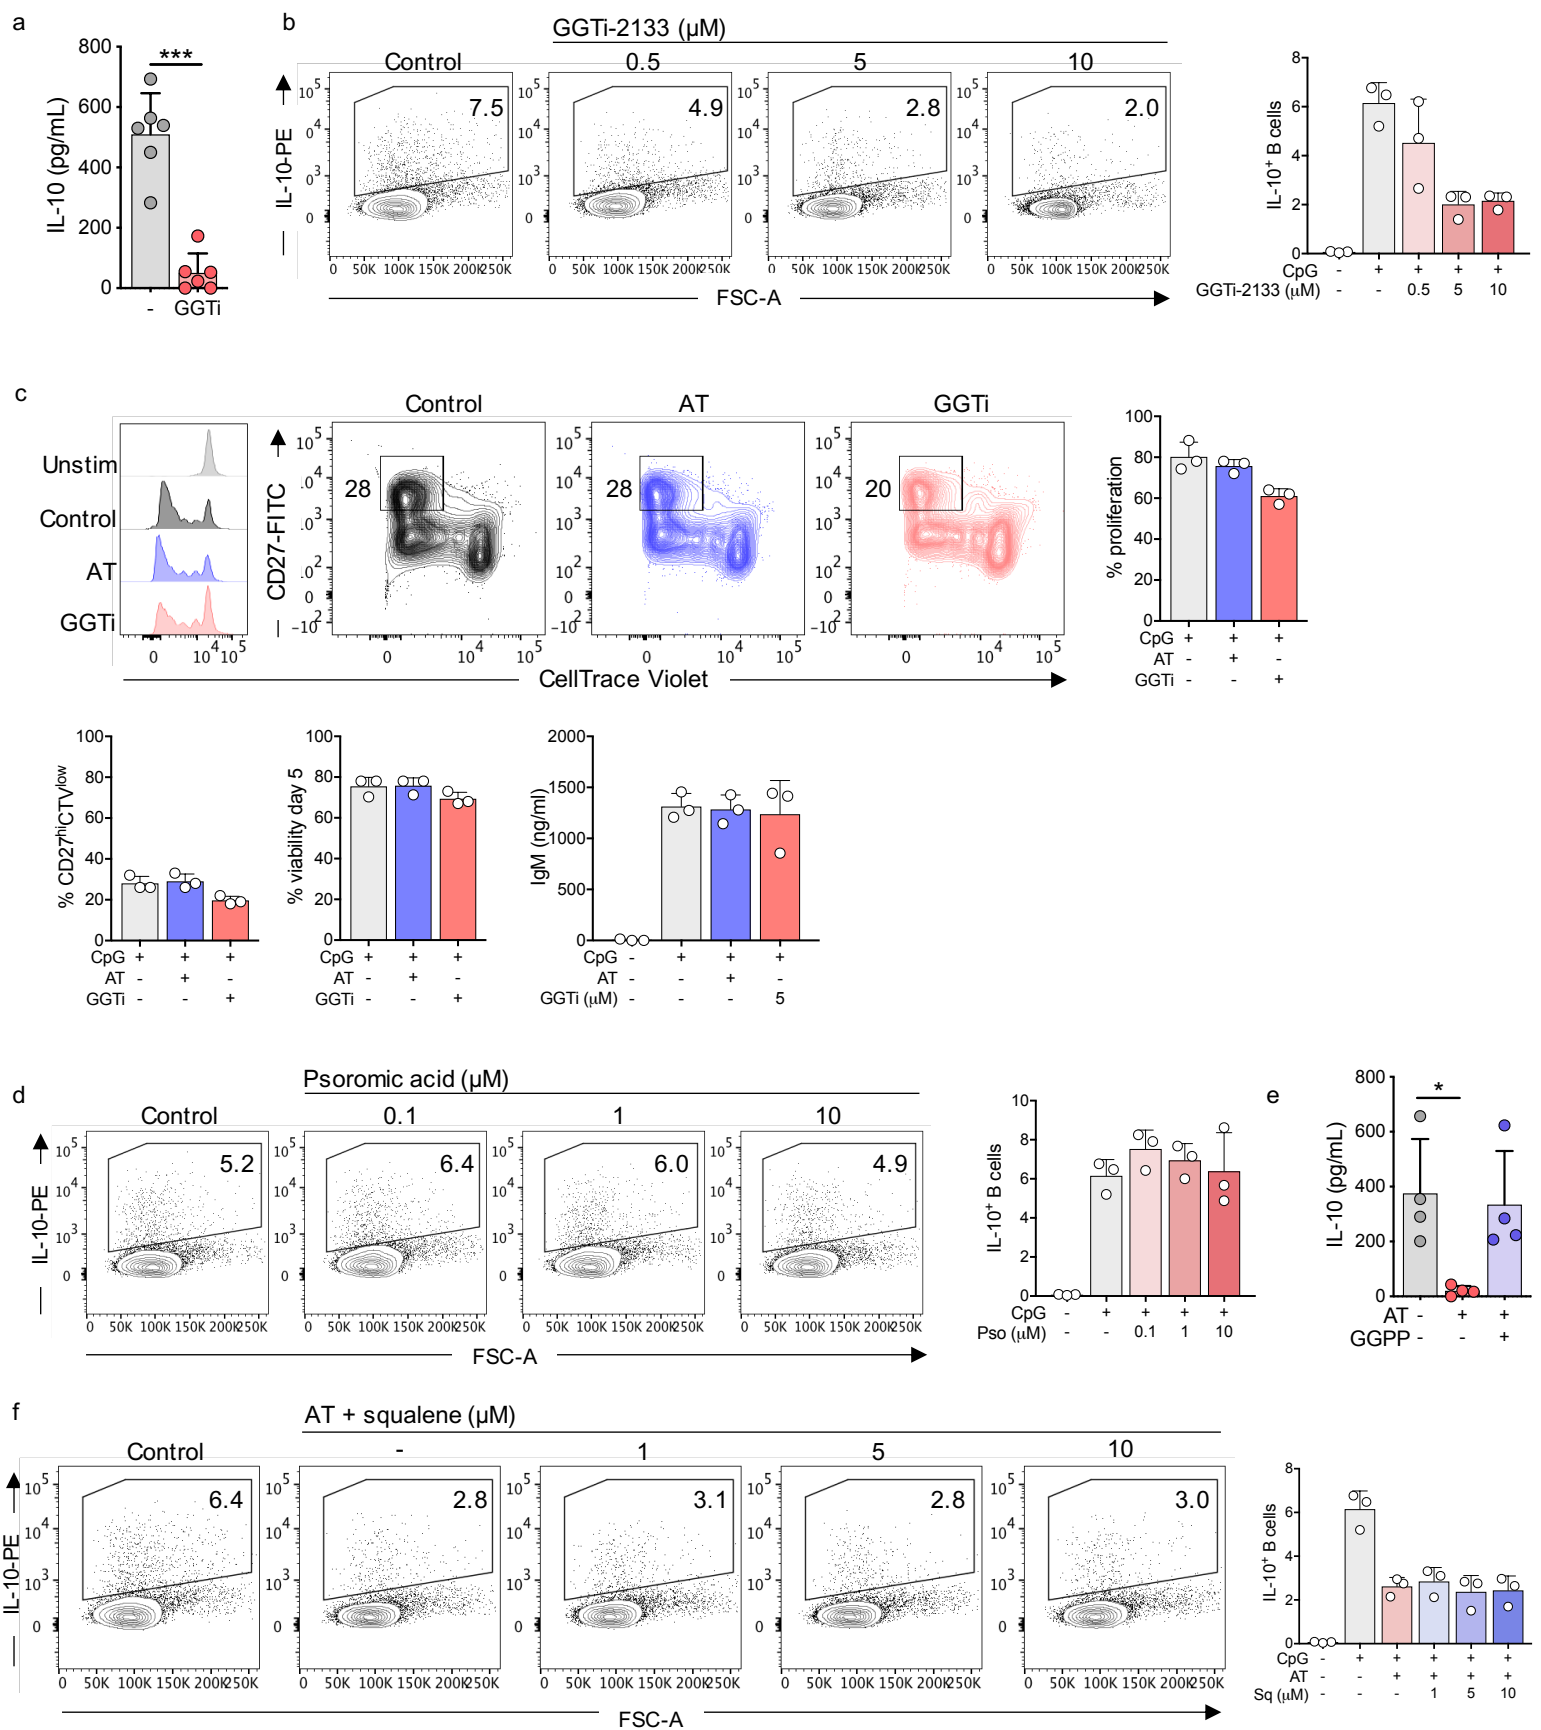

**Supplementary Figure 5. Cholesterol metabolism regulates IL-10 via GGTase and GGPP.** **a.** IL-10 secretion in TLR9 stimulated human B cells in the presence of geranylgeranyl transferase inhibition (GGTi), measured by ELISA ( $n=6$ ,  $p$ val = 0.001). **b.** IL-10 expression in human B cells after stimulation through TLR9  $\pm$  GGTi-2133 ( $n=3$ ). **c.** Proliferation, differentiation, viability (all at day 5), and IgM production (at day 7) by human B cells after stimulation through TLR9  $\pm$  AT  $\pm$  GGTi-2133 ( $n=3$ ). **d-f.** IL-10 production in TLR9 stimulated human B cells  $\pm$  psoromic acid (**d**,  $n=3$ ),  $\pm$  atorvastatin (AT)  $\pm$  geranylgeranyl pyrophosphate (GGPP) (**e**,  $n=4$ ,  $p$ va = 0.03), or  $\pm$  AT  $\pm$  Squalene (**f**,  $n=3$ ). Each data point represents individual donors. All data presented are mean  $\pm$  SD. Statistical testing in (a) was done by a paired t test, or in (e) by a Friedman's test with Dunns's multiple comparisons test. \* $P < 0.05$ , \*\*\* $P < 0.001$  and all significant values are shown.

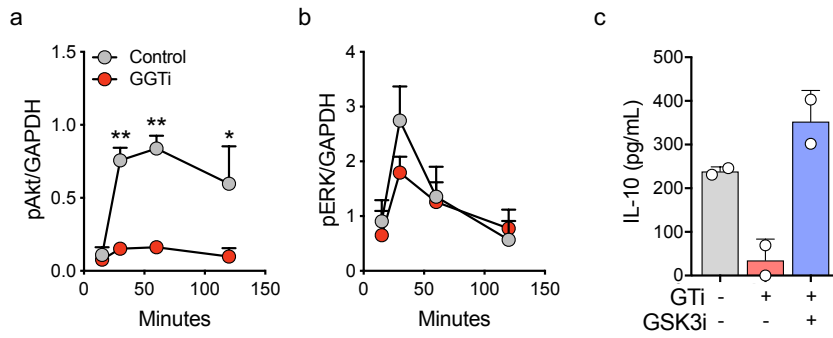

**Supplementary Figure 6. GGTase and GGPP regulate IL-10 induction downstream of TLR9 via PI3K, AKT, and ERK. a-b.** Quantification of AKT (a) and ERK (b) phosphorylation over time in human B cells after stimulation through TLR9 ± geranylgeranyl transferase inhibitor (GGTi) (both n=3, pvals = 0.004, 0.001, 0.01). c. IL-10 secretion from human B cells after stimulation through TLR9 ± GGTi ± GSK3i (n=2). All data presented are mean ± SD. Statistical testing in all figures was done by a two-way ANOVA with Sidak's multiple comparisons test. \* $P < 0.05$ , \*\* $P < 0.01$  and all significant values are shown.



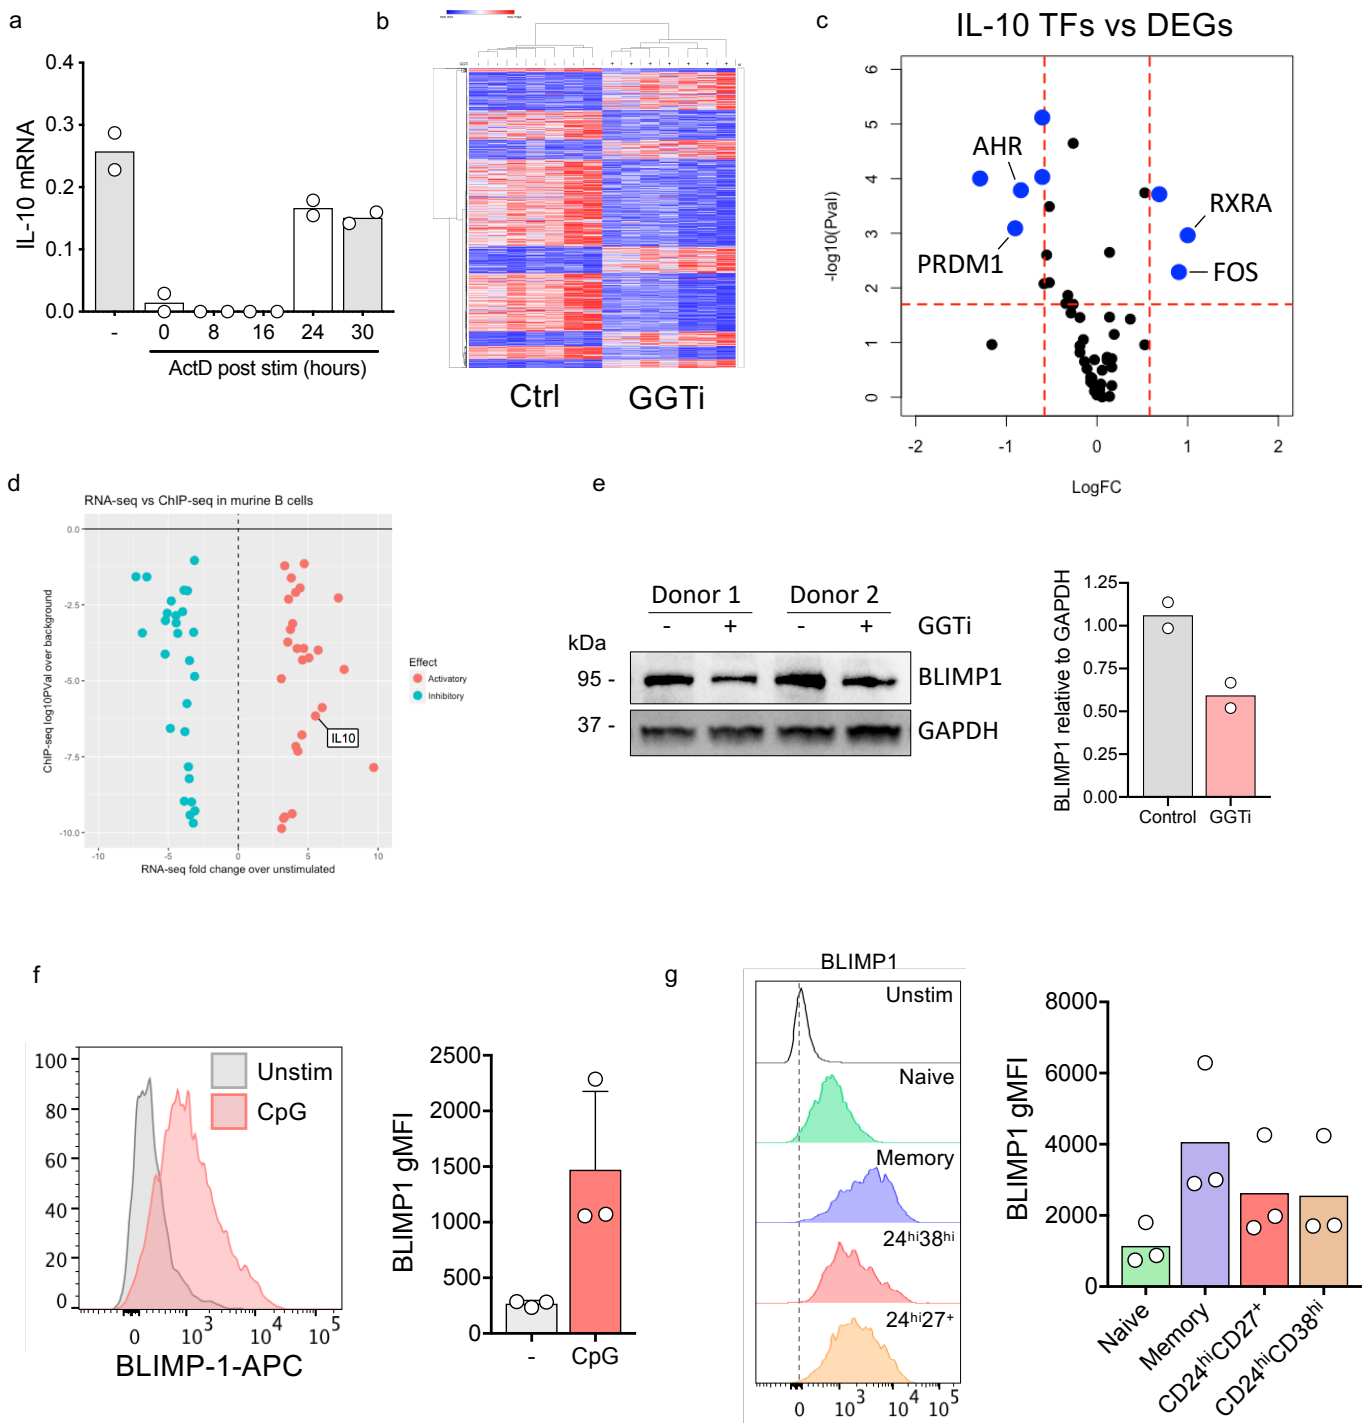

**Supplementary Figure 7. A transcriptional event mediated by GGTase after TLR9 stimulation is required for the expression of a transcription factor necessary for IL-10.** **a.** qRT-PCR analysis of IL-10 expression in B cells following TLR9 stimulation  $\pm$  actinomycin D (ActD) added at the indicated time post-stimulation, with all cells acquired at 40 hours ( $n=2$ ). **b.** A heatmap representing the global profile of differentially expressed genes ( $\text{FDR}<0.05$ , Fold change  $>1.5$ ) in human B cells following stimulation through TLR9  $\pm$  geranylgeranyl transferase inhibition (GGTi). **c.** All previously experimentally validated IL-10 transcription factors, and their FDR and fold change in our data set. Red dashed lines represent  $\text{FDR}=0.05$  and fold change  $=1.5$ . **d.** CHIP-seq (y-axis) vs RNA-seq (x-axis) data from GSE71698, showing enriched targets of BLIMP1, and the correlative change in gene expression. **e.** BLIMP1 protein levels after B cells were stimulated with CpG in the presence or absence of GGTi ( $n=2$ ). **(f-g)** Expression of BLIMP1 in human B cells at 40 hours after stimulation through TLR9, either in bulk B cells (**f**,  $n=3$ ), or in different B cell phenotypes (**g**,  $n=3$ ). Each data point represents individual donors. All data presented are mean  $\pm$  SD. FDR values were calculated in EdgeR using the default Benjamini-Hochberg correction

**a**

| Patient | Status  | Mutation      | Sex | Age |
|---------|---------|---------------|-----|-----|
| MKD1    | MKD     | V377I/I268T   | M   | 26  |
| HD1     | Healthy | NA            | M   | 27  |
| MKD2    | MKD     | V377I/H380R   | M   | 29  |
| HD2     | Healthy | NA            | M   | 32  |
| MKD3    | MKD     | V377I/G/G202R | M   | 26  |
| HD3     | Healthy | NA            | M   | 22  |
| MKD4    | MKD     | V377I/H380R   | M   | 27  |
| HD4     | Healthy | NA            | M   | 27  |
| MKD5    | MKD     | V377I/R215X   | M   | 26  |
| HD5     | Healthy | NA            | M   | 27  |
| MKD6    | MKD     | V377I/I268T   | F   | 7   |
| HD6     | Healthy | NA            | M   | 40  |

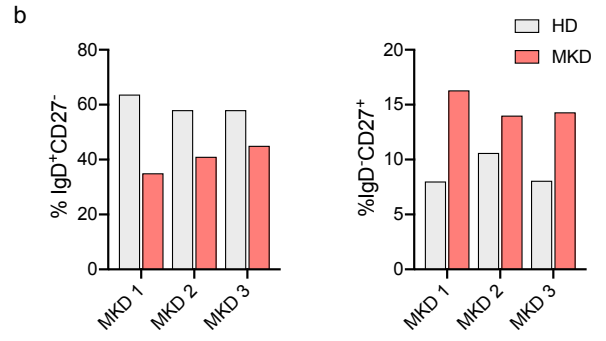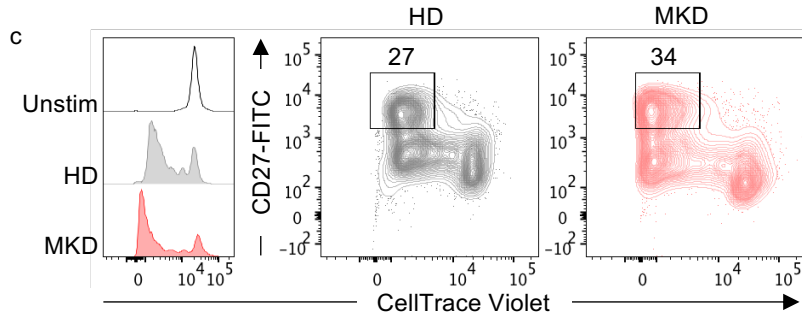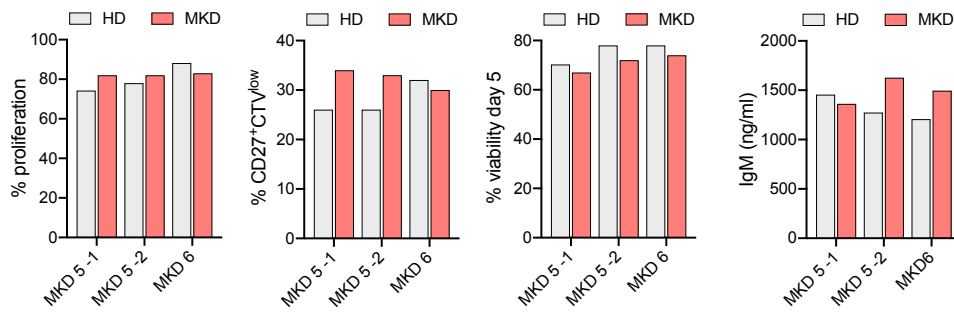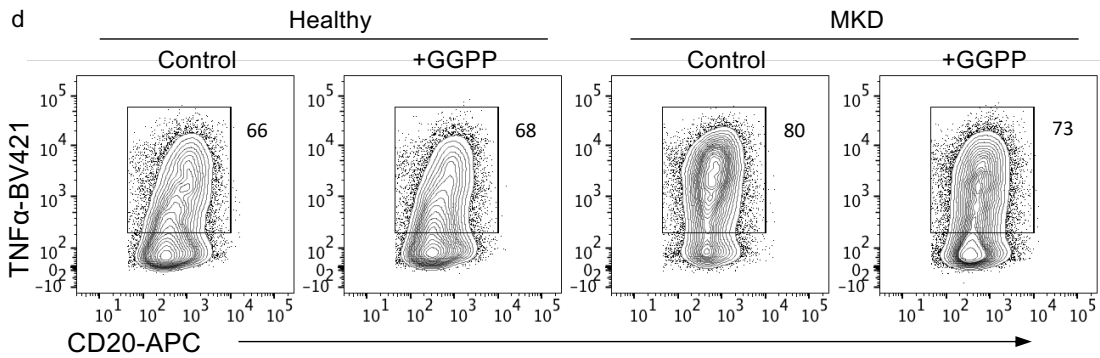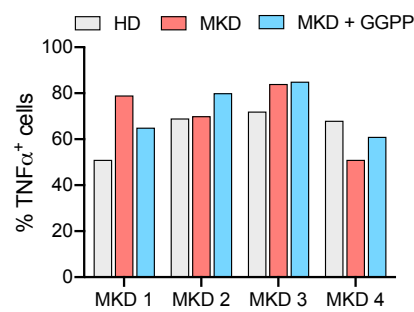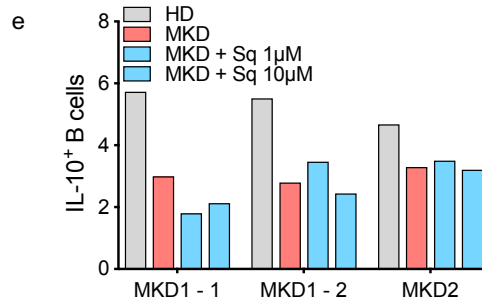

f

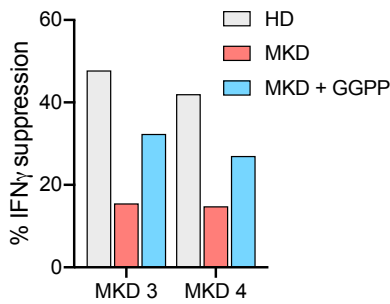

g

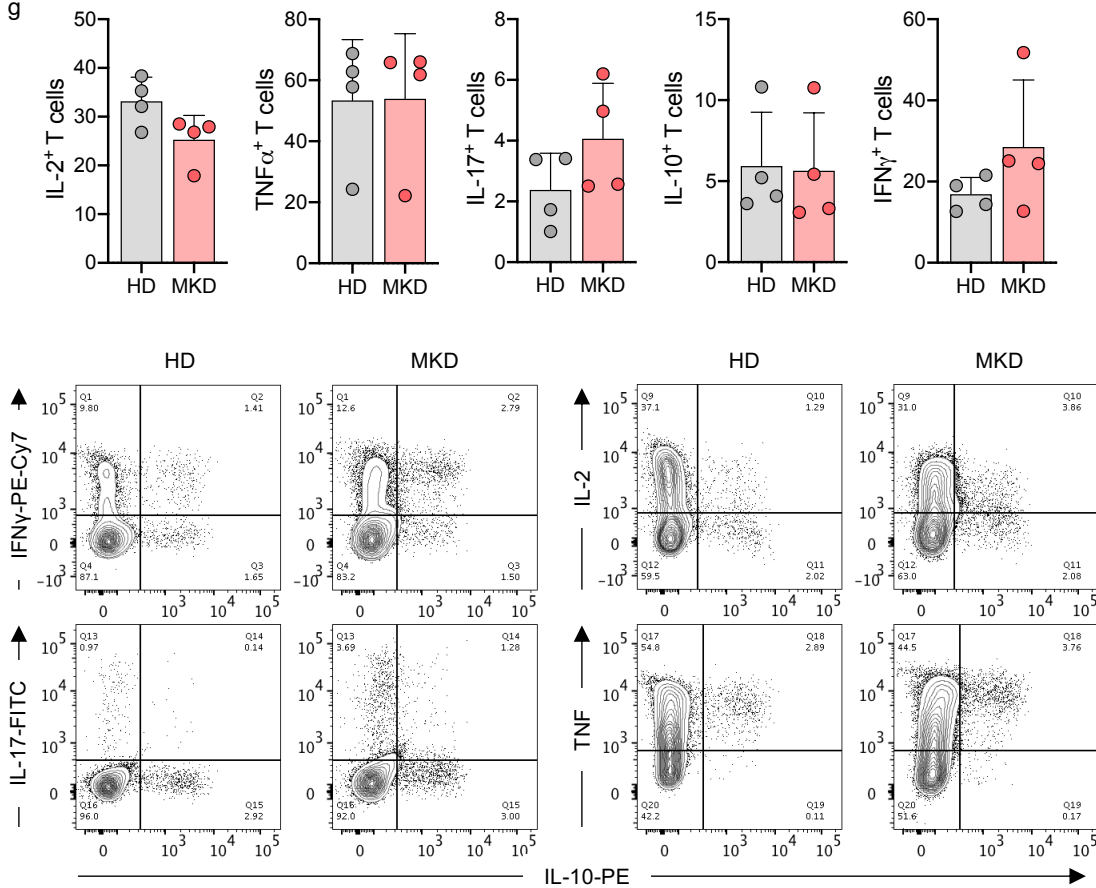

**Supplementary Figure 8. MKD patients show poor regulatory B cell responses, but normal T cell responses.** a. Clinical information for healthy donors (HD) and mevalonate kinase deficient (MKD) patients used in this study. b. Naive versus memory B cell populations in MKD patients relative to healthy donors, as a percentage of total CD19<sup>+</sup> B cells. c. Proliferation, differentiation, viability (at day 5), and IgM production (at day 7) by HD or MKD patient B cells after stimulation through TLR9. Technical repeats shown for MKD 5 as suffixed with -1 and -2. d. TNFα expression in human B cells from HD or MKD patients stimulated through TLR9 ± geranylgeranyl pyrophosphate (GGPP). e. IL-10 expression in B cells from MKD patients and HD after stimulation through TLR9 ± squalene (sq). Technical repeats shown for MKD 5 as suffixed with -1 and -2. f. IFNγ suppression in human CD4<sup>+</sup> T cells of healthy controls and MKD patients after co-culture with autologous TLR9 activated B cells ± GGPP treated B cells prior to co-culture. g. Cytokine production in CD4<sup>+</sup> T cells from MKD patients and healthy controls (n=4). Each data point represents individual donors. All data presented are mean ± SD. All significant values are shown.

Figure 3d

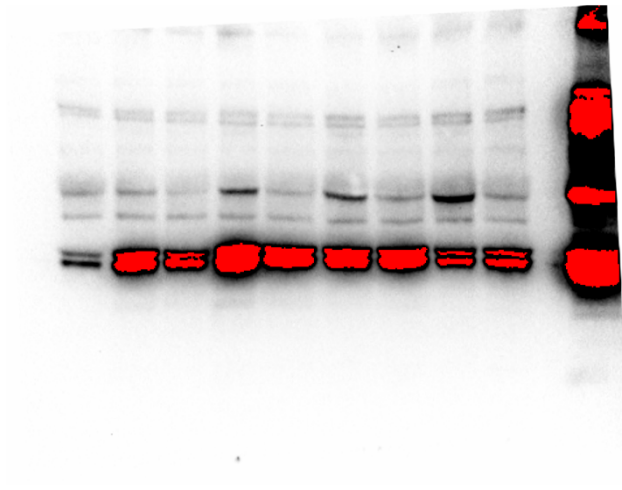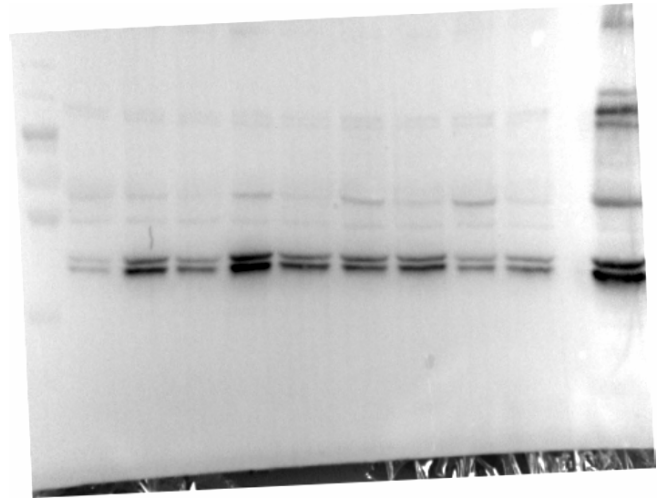

Figure 5f and g

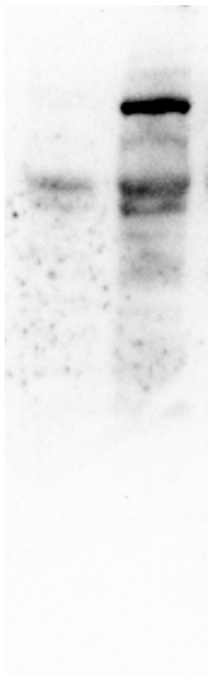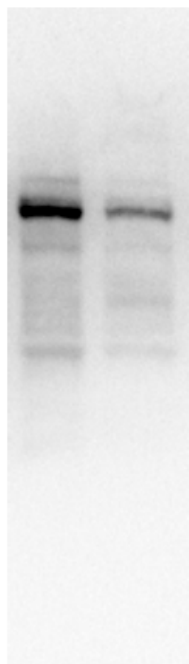

Sup Fig 7e

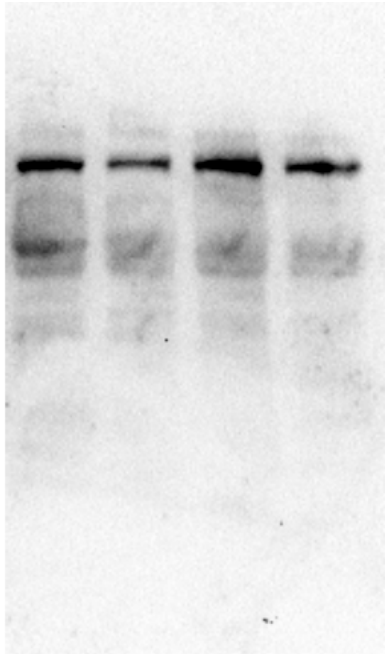

Supplement: 41467_2020_17179_MOESM1_ESM.pdf [file 41467_2020_17179_MOESM1_ESM.pdf]
